# Supplementary material for: Periodic albinism of a widely used albino mutant of Xenopus laevis caused by deletion of two exons in the Hermansky–Pudlak syndrome type 4 gene
Source: PubMed Central journal article supplement (PMC7839477; doi:10.1111/gtc.12818), 2020-11-28
Supplement: GTC-26-31-s001.pdf [file GTC-26-31-s001.pdf]

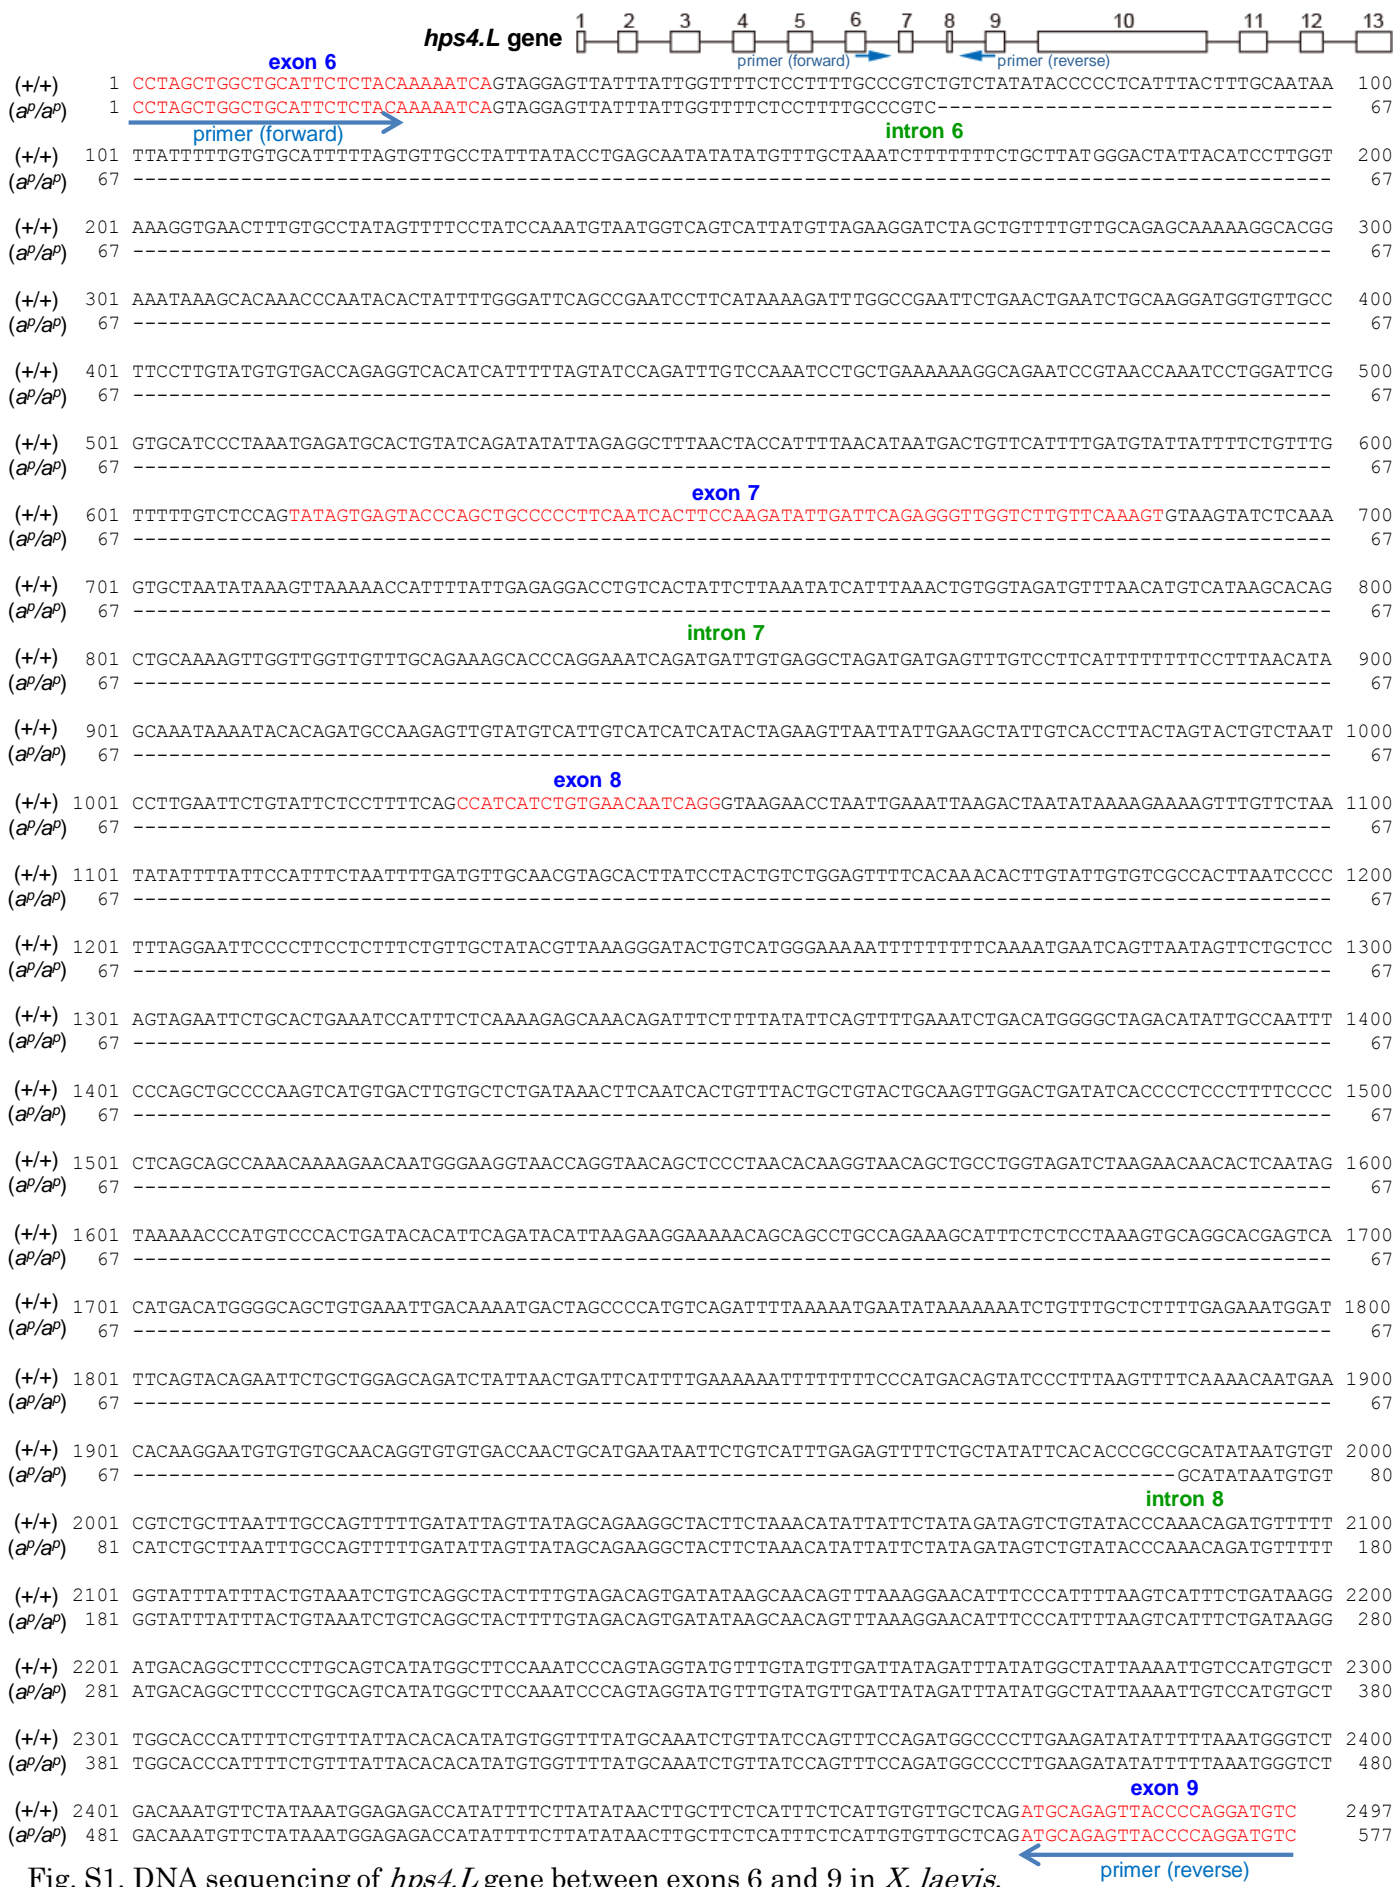

Fig. S1. DNA sequencing of *hps4.L* gene between exons 6 and 9 in *X. laevis*.
