# Supplementary material for: Periodic albinism of a widely used albino mutant of Xenopus laevis caused by deletion of two exons in the Hermansky–Pudlak syndrome type 4 gene
Source: PubMed Central journal article supplement (PMC7839477; doi:10.1111/gtc.12818), 2020-11-28
Supplement: GTC-26-31-s002.pdf [file GTC-26-31-s002.pdf]

***hps4.L* transcripts**

|                                   |      |                                                                                   |                                                                                        |                                                            |           |
|-----------------------------------|------|-----------------------------------------------------------------------------------|----------------------------------------------------------------------------------------|------------------------------------------------------------|-----------|
|                                   |      |  |                                                                                        |                                                            |           |
|                                   |      |                                                                                   | <b>exon 1</b>                                                                          | <b>exon 2</b>                                              |           |
| (+/+)                             | 1    | ATGGCATCCTCTATTCC                                                                 | ACTGAAACACAGGCCAGCATCATG                                                               | GTTGAATTATTCTTTCTTTACGATGGATCAAAGGTGAGAGGTGAAGGTGATCCCACCA | 100       |
| (a <sup>p</sup> /a <sup>p</sup> ) | 1    | ATGGCATCCTCTATTCC                                                                 | ACTGAAACACAGGCCAGCATCATG                                                               | GTTGAATTATTCTTTCTTTACGATGGATCAAAGGTGAGAGGTGAAGGTGATCCCACCA | 100       |
|                                   |      |                                                                                   | <b>exon 3</b>                                                                          |                                                            |           |
| (+/+)                             | 101  | GTGTTGGTATAAAATTA                                                                 | CTTCTACCCACACAGACAATCCTTGACCAGCAGGAATTGCTGTGTGGTCAAATTCAGGTGTTGTCCGTTGTATGACTGAGAT     |                                                            | 200       |
| (a <sup>p</sup> /a <sup>p</sup> ) | 101  | GTGTTGGTATAAAATTA                                                                 | CTTCTACCCACACAGACAATCCTTGACCAGCAGGAATTGCTGTGTGGTCAAATTCAGGTGTTGTCCGTTGTATGACTGAGAT     |                                                            | 200       |
|                                   |      |                                                                                   | <b>exon 4</b>                                                                          |                                                            |           |
| (+/+)                             | 201  | CACCAACTCTTCTCCCA                                                                 | ACCTTATACGACTACGCAAACCTGAAATTTGCCATTGTCGTTGATGGGGACTATTTGTGGGCTCTTGGGTGTTTCAGTAGATGTT  |                                                            | 300       |
| (a <sup>p</sup> /a <sup>p</sup> ) | 201  | CACCAACTCTTCTCCCA                                                                 | ACCTTATACGACTACGCAAACCTGAAATTTGCCATTGTCGTTGATGGGGACTATTTGTGGGCTCTTGGGTGTTTCAGTAGATGTT  |                                                            | 300       |
|                                   |      |                                                                                   | <b>exon 5</b>                                                                          |                                                            |           |
| (+/+)                             | 301  | GCAGATGTCAGTTGCA                                                                  | AGCACTTCTTACAAGAACTAATTTGGGCTGTTCTGTTCTATAATGGACCTTTGCGGGATGCCTATGAGGTCCGTTTCACAGGCTG  |                                                            | 400       |
| (a <sup>p</sup> /a <sup>p</sup> ) | 301  | GCAGATGTCAGTTGCA                                                                  | AGCACTTCTTACAAGAACTAATTTGGGCTGTTCTGTTCTATAATGGACCTTTGCGGGATGCCTATGAGGTCCGTTTCACAGGCTG  |                                                            | 400       |
|                                   |      |                                                                                   | <b>exon 6</b>                                                                          |                                                            |           |
| (+/+)                             | 401  | AGCTAAGCAACGAATG                                                                  | GAATCTTTACATTGAATTCATTTCAGAACACCAGCACCAGCTACACAGGATCTTCAATTCCTGAGTCATCTTGATAAAACTAA    |                                                            | 500       |
| (a <sup>p</sup> /a <sup>p</sup> ) | 401  | AGCTAAGCAACGAATG                                                                  | GAATCTTTACATTGAATTCATTTCAGAACACCAGCACCAGCTACACAGGATCTTCAATTCCTGAGTCATCTTGATAAAACTAA    |                                                            | 500       |
|                                   |      |                                                                                   | <b>exon 6</b>                                                                          |                                                            |           |
| (+/+)                             | 501  | AGTAGACCTCTCCTAT                                                                  | TGCTGAAAGCTGCCCTCATTTTGCAGACCTGCCAGAGATTTCCCTTACATCCTAGCTGGCTGCATTCTCTACAAAAATCA       | TATA                                                       | 600       |
| (a <sup>p</sup> /a <sup>p</sup> ) | 501  | AGTAGACCTCTCCTAT                                                                  | TGCTGAAAGCTGCCCTCATTTTGCAGACCTGCCAGAGATTTCCCTTACATCCTAGCTGGCTGCATTCTCTACAAAAATCA       | ----                                                       | 596       |
|                                   |      |                                                                                   | <b>exon 7</b>                                                                          | <b>exon 8</b>                                              |           |
| (+/+)                             | 601  | GTGAGTACCCAGCTGC                                                                  | CCCTTCAATCACTTCCAAGATATTGATTTCAGAGGGTTGGTCTTGTTCAAAGTCCATCATCTGTGAACAATCAGG            | ATGCAGAGT                                                  | 700       |
| (a <sup>p</sup> /a <sup>p</sup> ) | 596  | -----                                                                             | -----                                                                                  | -----                                                      | ATGCAGAGT |
|                                   |      |                                                                                   | <b>exon 9</b>                                                                          | <b>exon 10</b>                                             |           |
| (+/+)                             | 701  | TACCCAGGATGCTGT                                                                   | ATGATCCCTGTATTGTGAATTTGAAATGAAATAACTTCACTTCGCCACTACCTGCCGAGTGGATGACAAGAATGCCACACC      |                                                            | 800       |
| (a <sup>p</sup> /a <sup>p</sup> ) | 606  | TACCCAGGATGCTGT                                                                   | ATGATCCCTGTATTGTGAATTTGAAATGAAATAACTTCACTTCGCCACTACCTGCCGAGTGGATGACAAGAATGCCACACC      |                                                            | 705       |
|                                   |      |                                                                                   | <b>(stop)</b>                                                                          |                                                            |           |
| (+/+)                             | 801  | TTCAAGAACATTTGTC                                                                  | AACGCTTGGCAAAAACTGCAGGAAACCAGTTTCCAGTCTCAGAGGATGGTACTCAGGAAGGAATAACTGGAGGCGGGGAATCT    |                                                            | 900       |
| (a <sup>p</sup> /a <sup>p</sup> ) | 706  | TTCAAGAACATTTGTC                                                                  | AACGCTTGGCAAAAACTGCAGGAAACCAGTTTCCAGTCTCAGAGGATGGTACTCAGGAAGGAATAACTGGAGGCGGGGAATCT    |                                                            | 805       |
|                                   |      |                                                                                   | <b>exon 9</b>                                                                          |                                                            |           |
| (+/+)                             | 901  | TTTCCAGTGCACCTT                                                                   | CCAACAGAGACTCCAATACAAGGAGCAGGTGCAGGTTTACTCGTTGACAAAAGTGTAGAATTCGCCCTCCTAAGCTTAATGA     |                                                            | 1000      |
| (a <sup>p</sup> /a <sup>p</sup> ) | 806  | TTTCCAGTGCACCTT                                                                   | CCAACAGAGACTCCAATACAAGGAGCAGGTGCAGGTTTACTCGTTGACAAAAGTGTAGAATTCGCCCTCCTAAGCTTAATGA     |                                                            | 905       |
|                                   |      |                                                                                   | <b>exon 9</b>                                                                          |                                                            |           |
| (+/+)                             | 1001 | CAGACAGCCCAATGCA                                                                  | ATGTTTCAATCACCATTAAACCAGGAAAGGACCAGGCAATCCAAGGAACCAAAATCATCTGGTGGTAAACCAGTAAAGGCACACAG |                                                            | 1100      |
| (a <sup>p</sup> /a <sup>p</sup> ) | 906  | CAGACAGCCCAATGCA                                                                  | ATGTTTCAATCACCATTAAACCAGGAAAGGACCAGGCAATCCAAGGAACCAAAATCATCTGGTGGTAAACCAGTAAAGGCACACAG |                                                            | 1005      |
|                                   |      |                                                                                   | <b>exon 9</b>                                                                          |                                                            |           |
| (+/+)                             | 1101 | TGATATCAACTCTTCC                                                                  | CTGTATAATTTGGTCTAATTTGTTCCGAAGCAGAAGGCTATATCAGAAGAGACAGAGGATAATAACGACATTAACCGAGAGCGT   |                                                            | 1200      |
| (a <sup>p</sup> /a <sup>p</sup> ) | 1006 | TGATATCAACTCTTCC                                                                  | CTGTATAATTTGGTCTAATTTGTTCCGAAGCAGAAGGCTATATCAGAAGAGACAGAGGATAATAACGACATTAACCGAGAGCGT   |                                                            | 1105      |
|                                   |      |                                                                                   | <b>exon 9</b>                                                                          |                                                            |           |
| (+/+)                             | 1201 | TTATCTACCGGTAGCT                                                                  | TTGCAACGTTGATTCTGTGATGGAATTTGAGACTAAAGAGGATGGACTGGAACATTTGAGGACTATGTTCCAGTGTCTCTGA     |                                                            | 1300      |
| (a <sup>p</sup> /a <sup>p</sup> ) | 1106 | TTATCTACCGGTAGCT                                                                  | TTGCAACGTTGATTCTGTGATGGAATTTGAGACTAAAGAGGATGGACTGGAACATTTGAGGACTATGTTCCAGTGTCTCTGA     |                                                            | 1205      |
|                                   |      |                                                                                   | <b>exon 9</b>                                                                          |                                                            |           |
| (+/+)                             | 1301 | AAGATAATACCAGTACT                                                                 | GAAGACCAACAGATAGTTGTGAACAGTCCATACTGTTAGGGAAGCCTGAAAGTGTGAGTACAGAAAAGACAACACAGAATT      |                                                            | 1400      |
| (a <sup>p</sup> /a <sup>p</sup> ) | 1206 | AAGATAATACCAGTACT                                                                 | GAAGACCAACAGATAGTTGTGAACAGTCCATACTGTTAGGGAAGCCTGAAAGTGTGAGTACAGAAAAGACAACACAGAATT      |                                                            | 1305      |
|                                   |      |                                                                                   | <b>exon 9</b>                                                                          |                                                            |           |
| (+/+)                             | 1401 | TAATACCAACGACAGC                                                                  | ACCTTAGACAAAAGTTCAACATCAAGTCAAACAACAGATATCGGTTTTTACCAAAAGGTTTTTGGGGTGACAGACTGGTCATTA   |                                                            | 1500      |
| (a <sup>p</sup> /a <sup>p</sup> ) | 1306 | TAATACCAACGACAGC                                                                  | ACCTTAGACAAAAGTTCAACATCAAGTCAAACAACAGATATCGGTTTTTACCAAAAGGTTTTTGGGGTGACAGACTGGTCATTA   |                                                            | 1405      |
|                                   |      |                                                                                   | <b>exon 9</b>                                                                          |                                                            |           |
| (+/+)                             | 1501 | CTTGTGACGTCACCC                                                                   | AGTCACTGACAGCACAACTGGTACAGATGATGTTATATGTCATAATGTTAAAGGCTTAGTGTGGCTCTCTTGGCAGAAT        |                                                            | 1600      |
| (a <sup>p</sup> /a <sup>p</sup> ) | 1406 | CTTGTGACGTCACCC                                                                   | AGTCACTGACAGCACAACTGGTACAGATGATGTTATATGTCATAATGTTAAAGGCTTAGTGTGGCTCTCTTGGCAGAAT        |                                                            | 1505      |
|                                   |      |                                                                                   | <b>exon 11</b>                                                                         |                                                            |           |
| (+/+)                             | 1601 | GTCTTTTCCAACATG                                                                   | ACAAGGCCCAATTCAGGATGTGATGACAGCACCTTGGCTTCTCTCAATGGCCTAGAAGTTCATCTTAAAGAGACTTTGCCAGT    |                                                            | 1700      |
| (a <sup>p</sup> /a <sup>p</sup> ) | 1506 | GTCTTTTCCAACATG                                                                   | ACAAGGCCCAATTCAGGATGTGATGACAGCACCTTGGCTTCTCTCAATGGCCTAGAAGTTCATCTTAAAGAGACTTTGCCAGT    |                                                            | 1605      |
|                                   |      |                                                                                   | <b>exon 12</b>                                                                         |                                                            |           |
| (+/+)                             | 1701 | CAACAACAATAATCT                                                                   | TACAAGAGCAGCTACAGCTTTACCCATTATGATCCTATTTCAGCATATTTCTACTGCCAACCTCCCGTCTGTTTCAAGCAGCGAT  |                                                            | 1800      |
| (a <sup>p</sup> /a <sup>p</sup> ) | 1606 | CAACAACAATAATCT                                                                   | TACAAGAGCAGCTACAGCTTTACCCATTATGATCCTATTTCAGCATATTTCTACTGCCAACCTCCCGTCTGTTTCAAGCAGCGAT  |                                                            | 1705      |
|                                   |      |                                                                                   | <b>exon 13</b>                                                                         |                                                            |           |
| (+/+)                             | 1801 | GACCGCCACTTCTCC                                                                   | GAGCTGCCACTCTGATACATTTCCGACTTTAGTCAACATCAGTCTTCCAGGAAATGACAGTAAGAAATGCAGCCTCTGCCGTCT   |                                                            | 1900      |
| (a <sup>p</sup> /a <sup>p</sup> ) | 1706 | GACCGCCACTTCTCC                                                                   | GAGCTGCCACTCTGATACATTTCCGACTTTAGTCAACATCAGTCTTCCAGGAAATGACAGTAAGAAATGCAGCCTCTGCCGTCT   |                                                            | 1805      |
|                                   |      |                                                                                   | <b>exon 13</b>                                                                         |                                                            |           |
| (+/+)                             | 1901 | ATGGCTGCCAAAGTGT                                                                  | GTCATGAGACCTACTTCCAGCAGCTGGCACCACCTATAAGGAACCTCTGGAGTCCCTGACCCACAGGACAATGCATTCTTCTT    |                                                            | 2000      |
| (a <sup>p</sup> /a <sup>p</sup> ) | 1806 | ATGGCTGCCAAAGTGT                                                                  | GTCATGAGACCTACTTCCAGCAGCTGGCACCACCTATAAGGAACCTCTGGAGTCCCTGACCCACAGGACAATGCATTCTTCTT    |                                                            | 1905      |
|                                   |      |                                                                                   | <b>exon 13</b>                                                                         |                                                            |           |
| (+/+)                             | 2001 | ATCCAGCAAGGCAAAG                                                                  | CAAAAATACTGAAACATGGTCTTAACCTGCTG                                                       | TAA(stop)                                                  | 2052      |
| (a <sup>p</sup> /a <sup>p</sup> ) | 1906 | ATCCAGCAAGGCAAAG                                                                  | CAAAAATACTGAAACATGGTCTTAACCTGCTG                                                       | TAA                                                        | 1957      |

Fig. S2. Comparison of *hps4.L* transcripts between wild type (+/+) and mutant (a<sup>p</sup>/a<sup>p</sup>) *X. laevis*. In the mutant *hps4.L* transcript lacking exons 7 and 8, a premature stop codon is created in exon 9. Accession numbers: +/+ *hps4.L*, LC577762 (DDBJ); a<sup>p</sup>/a<sup>p</sup> *hps4.L*, LC577763 (DDBJ)
