# Supplementary material for: Periodic albinism of a widely used albino mutant of Xenopus laevis caused by deletion of two exons in the Hermansky–Pudlak syndrome type 4 gene
Source: PubMed Central journal article supplement (PMC7839477; doi:10.1111/gtc.12818), 2020-11-28
Supplement: GTC-26-31-s003.pdf [file GTC-26-31-s003.pdf]

|                                                         |     |                                                                |     |
|---------------------------------------------------------|-----|----------------------------------------------------------------|-----|
| mouse                                                   | 1   | MATTTTPEKSAAWWNYFFLYDGSVKVKEGDPTRAGICYFYPPQTLLDQQEELLCGQLAGV   | 60  |
| human                                                   | 1   | MATSTSTEAKSASWWNYFFLYDGSVKVKEGDPTRAGICYFYPSQTLLDQQEELLCGQIAGV  | 60  |
| <i>X. laevis</i> (+/+)                                  | 1   | MASSIPTEHRPASWLNYYFFLYDGSKVRGEGDPTSVGINIFYPTQTILDQQEELLCGQIAGV | 60  |
| <i>X. laevis</i> ( <i>a<sup>p</sup>/a<sup>p</sup></i> ) | 1   | MASSIPTEHRPASWLNYYFFLYDGSKVRGEGDPTSVGINIFYPTQTILDQQEELLCGQIAGV | 60  |
| mouse                                                   | 61  | VRCLWDLSGTTPMLIRMRNLKFAIRADGDYLWALGCGVEISDASCRQFLDQLIGFFHFYM   | 120 |
| human                                                   | 61  | VRCVSDISDSPPTLVRLRKLKFAIKVDGDLWVLCAGVELPDVSCKRFLDQLVGFNFYFN    | 120 |
| <i>X. laevis</i> (+/+)                                  | 61  | VRCMTEITNSSPNLIRLRKLKFAIVVDGDLWALGCSVDVADVSCKHFLQELIGLFLFYN    | 120 |
| <i>X. laevis</i> ( <i>a<sup>p</sup>/a<sup>p</sup></i> ) | 61  | VRCMTEITNSSPNLIRLRKLKFAIVVDGDLWALGCSVDVADVSCKHFLQELIGLFLFYN    | 120 |
| mouse                                                   | 121 | GPVSLAYKSHPQEELSLOWDTSITQVLRSTSESHRIFNALWNLDRTKVEPLLLLKAALIL   | 180 |
| human                                                   | 121 | GPVSLAYENCSEQEELSTEWDTFIEQILKNTSDLHKIFNSLWNLDRTKVEPLLLLKAARIL  | 180 |
| <i>X. laevis</i> (+/+)                                  | 121 | GPLRDAYEVRSAEELSNEWNLYIEFIQNTSTDHLRIFNSLSHLDKTKVDPLLLLKAALIL   | 180 |
| <i>X. laevis</i> ( <i>a<sup>p</sup>/a<sup>p</sup></i> ) | 121 | GPLRDAYEVRSAEELSNEWNLYIEFIQNTSTDHLRIFNSLSHLDKTKVDPLLLLKAALIL   | 180 |
| mouse                                                   | 181 | QTCQRSPhVLagCilyKGLIVNSQLLPSLTAKVLLHQTVPA-DQRlPGAGAAPQETGAAL   | 239 |
| human                                                   | 181 | QTCQRSPhILagCilyKGLIVSTQLPPSLTAKVLLHRTAPQ-EQRlPTGEDAPQEHGAAL   | 239 |
| <i>X. laevis</i> (+/+)                                  | 181 | QTCQRFPYILagCilyKHNIVSTQLPPSITSKILLIQRVGLVQSPSSVNNQDAELPQDV--  | 238 |
| <i>X. laevis</i> ( <i>a<sup>p</sup>/a<sup>p</sup></i> ) | 181 | QTCQRFPYILagCilyKNCrVTPGCLYDPCICN                              | 214 |
| mouse                                                   | 240 | PPDVQITSVFLSEEEVASLHEFFVEHETRL-----QGSS-VQYPP-WDQS----SP       | 284 |
| human                                                   | 240 | PPNVQIIPVfvtKEEAIslHEFFVEQmTRSLASPA--GLQDGS-AQHHP-KGGSTsALKE   | 295 |
| <i>X. laevis</i> (+/+)                                  | 239 | --CMIPVfVIENEITslRHYP--AEWmTRmPTPSrTLSTLgKKPAGNqFPVSEdGTQEGi   | 294 |
| mouse                                                   | 285 | TQaedAWASAAIPEPTPH-DGA--CPSGSGA-----DERLPRLEQECAGPTGLCTTACGQ   | 336 |
| human                                                   | 296 | N-ATGHVESMAWTTPDPT-SPDEACPDGRKE-----NGCLSGHDLESIRPAGLHNSARGE   | 348 |
| <i>X. laevis</i> (+/+)                                  | 295 | TGGGESFPVHLpTEETPIQgAGAGLLVDKsVELPFLsLMTDSPMQCSSPLNqERTRQsKE   | 354 |
| mouse                                                   | 337 | GsGLSSRLQkELCLsREELDSSE-----MHVSEAQEAfPPLpALGDLETLH-S-         | 383 |
| human                                                   | 349 | VlGLSSSLGkELVfLQEEldLSEIHipeAQEVEMASGHfAFLhVPVP-DGRAPyCKA-sL   | 406 |
| <i>X. laevis</i> (+/+)                                  | 355 | PKSSGGNPVK-----AHSDIN--SSLYNLVLIVPKQKAISE                      | 388 |
| mouse                                                   | 384 | ---SHSAPTLpEDTAIC-SCLHPCPLERlpESGRlGQLADLpLTNGQTVPGTDpLPSSM    | 439 |
| human                                                   | 407 | SASSSLEPTPPEDTAIS-SLRPPSAPeMLTQhGAQEQLEDHPGHSSQAPIPRADpLPRRT   | 465 |
| <i>X. laevis</i> (+/+)                                  | 389 | ETEDNNDIN---RERLSTGSfATCDsVMEfETKEDGLE--TFEDYVPVSLKDNtSTEDQT   | 443 |
| mouse                                                   | 440 | PVALPPQHPVgVEPSVep-----YNGAQE-SHSALPR--SSRSPDSPGpSPS---        | 484 |
| human                                                   | 466 | RrPLLLPRLDPGQRGNKlPTGEOGLDEDVDGvCE-SHAAPGLECSSGSANCQgAGPS---   | 521 |
| <i>X. laevis</i> (+/+)                                  | 444 | DSCEQSILLGkPESVS-----DRKDNTEfNTND--STLDKSSPSSQTTDIGfSP         | 490 |
| mouse                                                   | 485 | ----ADRTG--FKPSPSGRHAGlVPMNLYTHSVNGLVLSLLAEETLLSDTAAIEEVYHSS   | 538 |
| human                                                   | 522 | ----ADGIS--SRLTPAESCMGLVRMNLyTHcVKGLVLSLLAEePLLGDSAAIEEVYHSS   | 575 |
| <i>X. laevis</i> (+/+)                                  | 491 | KVfGVTdWSSLlVSSTQSSDStQLVQmMLyVhNvKGLVLALLAECPfQHDKASIQDvYDSt  | 550 |
| mouse                                                   | 539 | LASLNGLEVHLkETLpRDEASLTsSTYNfLHYDRiQSVL-----SANLpLVtAPQDRRfL   | 593 |
| human                                                   | 576 | LASLNGLEVHLkETLpRDEAAASTsSTYNfTHYDRiQSLL-----MANLpQvATPQDRRfL  | 630 |
| <i>X. laevis</i> (+/+)                                  | 551 | LASLNGLEVHLkETLpVNNNLTkSSYSfTHYDPIQHILtANLpSVSSThDRHfLRAATL    | 610 |
| mouse                                                   | 594 | QAVNLMHSDfALLPMLyEMTIrNASTAVYACSSPAQETyFQQLAPtARSSGFNPQDCAF    | 653 |
| human                                                   | 631 | QAVSLMHSEfAQLpALyEMTVrNASTAVYACCNPIQETyFQQLAPAArSSGFNPQDGAf    | 690 |
| <i>X. laevis</i> (+/+)                                  | 611 | IHSDFsQHq-----SFQEMTVrNAASAVYGCQSAVhETyFQQLAPPIrNSGVpDPQDNAf   | 665 |
| mouse                                                   | 654 | SLAGKAKQKLLKHGVNLL                                             | 671 |
| human                                                   | 691 | SLSGKAKQKLLKHGVNLL                                             | 708 |
| <i>X. laevis</i> (+/+)                                  | 666 | FLSSKAKQKLLKHGLNLL                                             | 683 |

Fig. S3. Amino acid sequence alignment of HPS4 from mouse, human, wild-type and mutant *X. laevis*.

The Hps4 protein of mutant *X. laevis* lacks amino acid residues 215–683, when compared with that of wild-type *X. laevis*. Identical residues are shaded. Asterisks (\*) show critical residues reported to be responsible for Rab9 binding in HPS4 in mice (Ohishi et al., 2019).

Reference sequences: mouse HPS4, NP\_001346782.1; human HPS4, NP\_001336825.1

Accession numbers: +/+ *X. laevis* *hps4.L*, LC577762 (DDBJ); *a<sup>p</sup>/a<sup>p</sup>* *X. laevis* *hps4.L*,

LC577763 (DDBJ)
